# Supplementary material
Source: PubMed Central journal article supplement (PMC4254697)

## **Supplemental Materials**

### **Supplemental Figure Legends**

**Supplemental Figure 1** – Kaplan-Meier curve for freedom from HF in all participants. Kaplan-Meier curve for freedom from HF in all participants after stratification by QT<sub>corr</sub> percentiles at baseline (p<0.001)

**Supplemental Figure 2** – Kaplan-Meier curve for freedom from CVD in all participants. Kaplan-Meier curve for freedom from CVD in all participant after stratification by QT<sub>corr</sub> percentiles at baseline (p<0.001)

**Supplemental Figure 3** – Kaplan-Meier curve for freedom from Stroke events in all participants. Kaplan-Meier curve for freedom from Stroke events in all participants after stratification by QT<sub>corr</sub> percentiles at baseline (p<0.001)

**Supplemental Table 1** - Baseline Characteristics for all patients and after stratification by short QT<sub>b</sub> at ≤ 390 ms, or QT<sub>b</sub> prolongation at ≥460 ms

|                                                 | Total       | QT <sub>b</sub> ≤390 ms<br>(n=500) | QT <sub>b</sub> >390 ms<br>(n=5773) | P value | QT <sub>b</sub> ≥460 ms<br>(n=173) | QT <sub>b</sub> <460 ms<br>(n=6100) | P value |
|-------------------------------------------------|-------------|------------------------------------|-------------------------------------|---------|------------------------------------|-------------------------------------|---------|
| Age, years                                      | 61.7±10.14  | 58.6±10.0                          | 62.0±10.1                           | <0.001  | 62.0±9.9                           | 61.7±10.1                           | 0.749   |
| Gender, % Female                                | 53.4        | 19.9                               | 56.3                                | <0.001  | 83.7                               | 52.6                                | <0.001  |
| Race, %                                         |             |                                    |                                     |         |                                    |                                     |         |
| Caucasian                                       | 38.3        | 32.0                               | 38.9                                | 0.030   | 36.6                               | 38.4                                | 0.750   |
| African American                                | 27.5        | 30.7                               | 27.1                                |         | 28.8                               | 27.4                                |         |
| Chinese American                                | 12.0        | 13.6                               | 11.9                                |         | 14.4                               | 12.0                                |         |
| Hispanic                                        | 22.2        | 23.7                               | 22.1                                |         | 20.2                               | 22.2                                |         |
| Hypertension, %                                 | 43.8        | 69.0                               | 55.1                                | <0.001  | 59.0                               | 43.4                                | <0.001  |
| Participants on antihypertensive medications, % | 36.0        | 72.0                               | 63.3                                | <0.001  | 48.6                               | 35.6                                | <0.001  |
| Systolic blood pressure, mmHg                   | 126.3±21.45 | 120.9±20.1                         | 126.8±21.5                          | <0.001  | 131.3±22.3                         | 126.2±21.4                          | 0.002   |
| Heart Rate, beats/min                           | 63.1±9.59   | 55.6±7.1                           | 63.7±9.5                            | <0.001  | 72.9±10.6                          | 62.8±9.4                            | <0.001  |
| Diabetes, %                                     | 11.1        | 6.8                                | 11.4                                | 0.001   | 21.4                               | 10.8                                | <0.001  |
| Family History of Heart Disease, %              | 42.6        | 42.9                               | 39.8                                | 0.205   | 46.1                               | 42.5                                | 0.354   |
| Current Smoking, %                              | 13.1        | 14.6                               | 12.9                                | 0.015   | 16.8                               | 13.0                                | 0.032   |
| QRS duration, ms                                | 91.4±9.66   | 91.9±9.4                           | 91.4±9.7                            | 0.229   | 92.2±9.4                           | 91.3±9.7                            | 0.263   |
| QT duration, ms                                 | 410.7±30.25 | 396.8±25.3                         | 411.9±30.3                          | <0.001  | 432.4±34.4                         | 410.1±29.9                          | <0.001  |
| QT <sub>b</sub> duration, ms                    | 417.2±20.61 | 378.8±10.1                         | 420.6±17.7                          | <0.001  | 471.8±11.5                         | 415.7±18.6                          | <0.001  |
| QT <sub>corr</sub> duration, ms                 | 410.7±17.79 | 381.0±11.5                         | 413.3±15.8                          | <0.001  | 450.9±16.2                         | 409.6±16.5                          | <0.001  |
| QT <sub>fr</sub> duration, ms                   | 414.8±18.9  | 381.8±11.0                         | 417.7±16.6                          | <0.001  | 456.8±16.9                         | 413.6±17.5                          | <0.001  |
| Height, cm                                      | 166.2±10.04 | 170.3±9.6                          | 165.8±10.0                          | <0.001  | 162.3±9.4                          | 166.3±10.0                          | <0.001  |
| Weight, lbs                                     | 172.8±38.16 | 172.5±34.8                         | 172.8±38.4                          | 0.831   | 177.1±41.7                         | 172.7±38.1                          | 0.133   |
| Body Mass Index, kg/m <sup>2</sup>              | 28.3±5.47   | 26.9±4.4                           | 28.4±5.5                            | <0.001  | 30.4±6.4                           | 28.2±5.4                            | <0.001  |
| Low-density Lipoprotein Cholesterol, mg/dL      | 117.6±31.43 | 118.2±30.9                         | 117.5±31.5                          | 0.663   | 114.1±31.7                         | 117.7±31.4                          | 0.145   |
| High-density Lipoprotein Cholesterol, mg/dL     | 51.1±14.81  | 48.8±13.9                          | 51.3±14.9                           | <0.001  | 51.9±14.1                          | 51.0±14.8                           | 0.444   |
| Aspirin, %                                      | 31.0        | 28.4                               | 31.2                                | 0.314   | 28.9                               | 31.0                                | 0.755   |
| Statins, %                                      | 14.4        | 13.0                               | 14.6                                | 0.336   | 20.2                               | 14.3                                | 0.028   |
| Education (Graduate) %                          | 17.8        | 17.4                               | 22.8                                | 0.005   | 12.7                               | 17.9                                | 0.156   |

QT<sub>corr</sub> = QT interval corrected for R-R interval, race, age and sex; QT<sub>b</sub> = QT corrected using Bazett formula; QT<sub>fr</sub> = QT interval corrected using the Framingham formula.

**Supplemental Table 2** - The association of baseline QT<sub>corr</sub> interval with incident CVD events with adjustment for left ventricular mass in the subset of participants with MRI data.

| Event  | No. Events/<br>No. at risk | Hazard<br>Ratio*<br>(per 10<br>ms) | 95% CI    | P value |
|--------|----------------------------|------------------------------------|-----------|---------|
| Stroke | 29/2604                    | 1.21                               | 0.99-1.48 | 0.061   |
| MI     | 40/2604                    | 1.17                               | 0.98-1.40 | 0.087   |
| HF     | 26/2604                    | 1.25                               | 1.00-1.55 | 0.051   |
| PVD    | 19/2604                    | 1.23                               | 0.95-1.59 | 0.114   |
| CHD    | 40/2604                    | 1.17                               | 0.98-1.40 | 0.087   |
| CVD §  | 68/2604                    | 1.20                               | 1.04-1.37 | 0.010   |

\* Adjusted for age, ethnicity, gender, traditional risk factors (current smoking, diabetes, family history of ischemic heart disease, LDL, HDL), QRS duration, aspirin use, statins use, BMI and education. Antihypertensive medication use and systolic blood pressure omitted due to co-linearity with left ventricular mass.

§ Cardiovascular disease: including MI, Resuscitated Cardiac Arrest, Coronary Heart Disease Death, Stroke or Stroke Death.

CI = confidence interval; QT<sub>corr</sub> = QT interval corrected for R-R interval, race, age and sex; MI = myocardial infarction; HF = heart failure; PVD = peripheral vascular disease; CVD = cardiovascular disease.

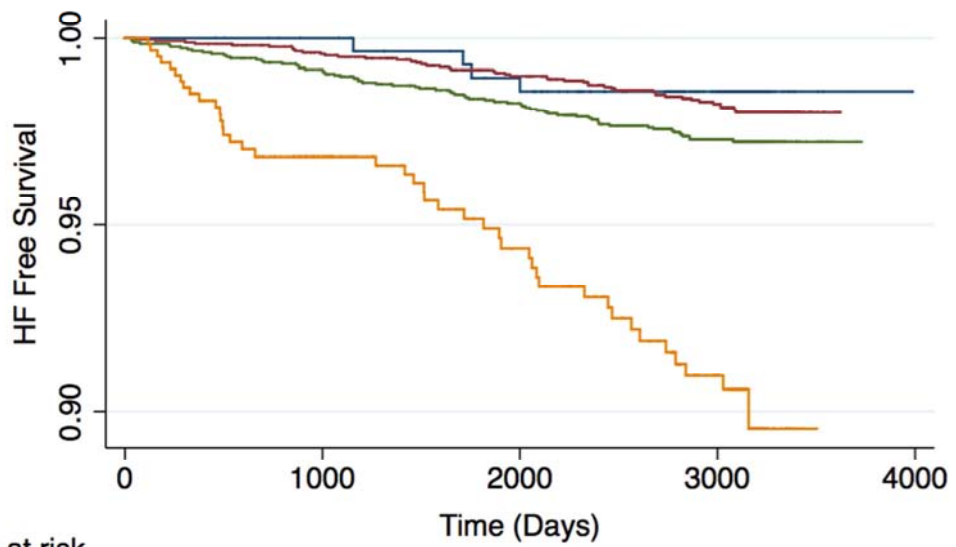

**Number at risk**

|                                  |      |      |      |      |   |
|----------------------------------|------|------|------|------|---|
| QTcorr 5th Percentile and Below  | 296  | 291  | 278  | 213  | 0 |
| QTcorr 5th to 50th Percentile    | 2661 | 2619 | 2471 | 1929 | 0 |
| QTcorr 50th to 95th Percentile   | 2660 | 2607 | 2449 | 1883 | 0 |
| QTcorr 95th Percentile and Above | 622  | 447  | 365  | 252  | 0 |

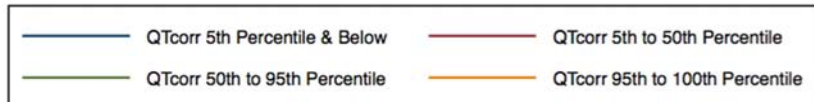

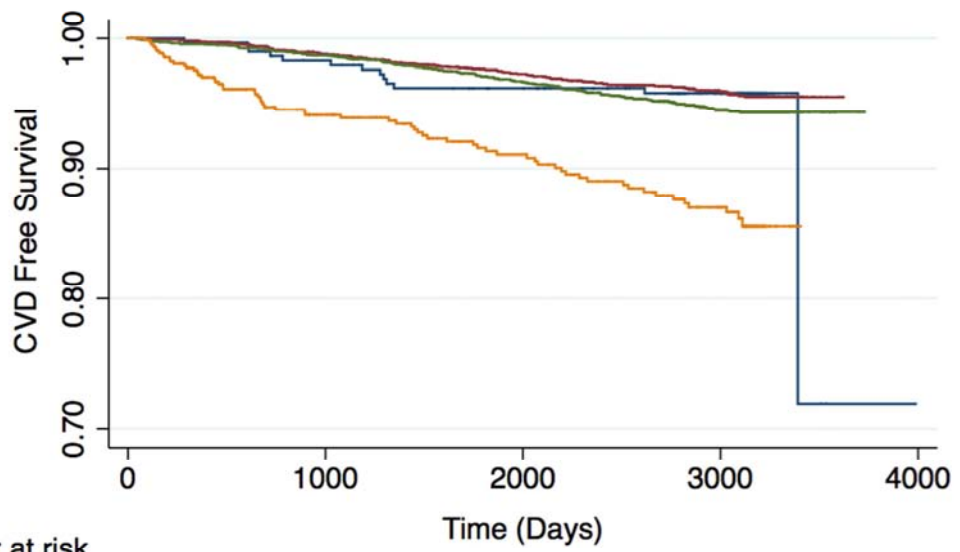

**Number at risk**

|                                  | 0    | 1000 | 2000 | 3000 | 4000 |
|----------------------------------|------|------|------|------|------|
| QTcorr 5th Percentile and Below  | 296  | 285  | 270  | 207  | 0    |
| QTcorr 5th to 50th Percentile    | 2661 | 2604 | 2444 | 1898 | 0    |
| QTcorr 50th to 95th Percentile   | 2660 | 2595 | 2415 | 1847 | 0    |
| QTcorr 95th Percentile and Above | 623  | 443  | 364  | 253  | 0    |

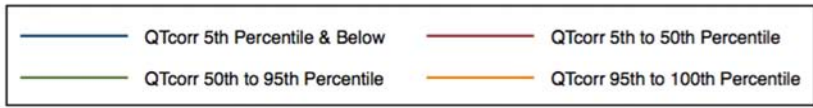

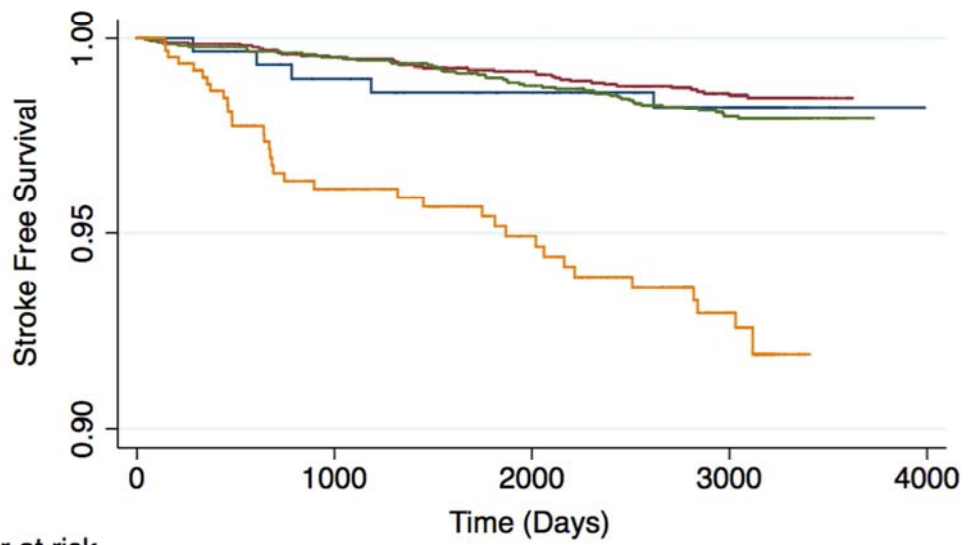

**Number at risk**

|                                  | 0    | 1000 | 2000 | 3000 | 4000 |
|----------------------------------|------|------|------|------|------|
| QTcorr 5th Percentile and Below  | 296  | 288  | 275  | 209  | 0    |
| QTcorr 5th to 50th Percentile    | 2661 | 2619 | 2473 | 1923 | 0    |
| QTcorr 50th to 95th Percentile   | 2660 | 2616 | 2458 | 1884 | 0    |
| QTcorr 95th Percentile and Above | 621  | 448  | 372  | 262  | 0    |

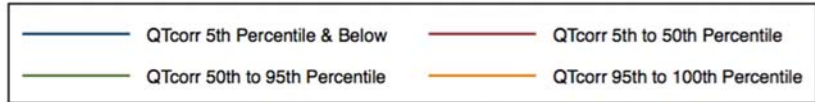

Supplement: NIHMS628865-supplement-supplement_1.pdf [file NIHMS628865-supplement-supplement_1.pdf]
